# Supplementary material for: Haptoglobin phenotype and levels in type 2 diabetes and effects of fenofibrate
Source: PubMed Central journal article supplement — J Diabetes Investig. 2024 Aug 22;15(11):1663–8. doi: 10.1111/jdi.14290 (PMC11527820; doi:10.1111/jdi.14290), 2024-08-22
Supplement: JDI-15-1663-s001.pdf [file JDI-15-1663-s001.pdf]

**Supplementary file**

J Diab Invest. Januszewski A.S. et al. **Haptoglobin Phenotype and Levels in Type 2 Diabetes and Effects of Fenofibrate.**

**Figure 1**

Flow chart of the Fenofibrate Intervention and Event Lowering in Diabetes (FIELD) study (left, reproduced from Cardiovasc Diabetol vol 3, issue 1, page 9 (2004).

<https://doi.org/10.1186/1475-2840-3-9>) and the timepoints for samples selection for these analyses (right).

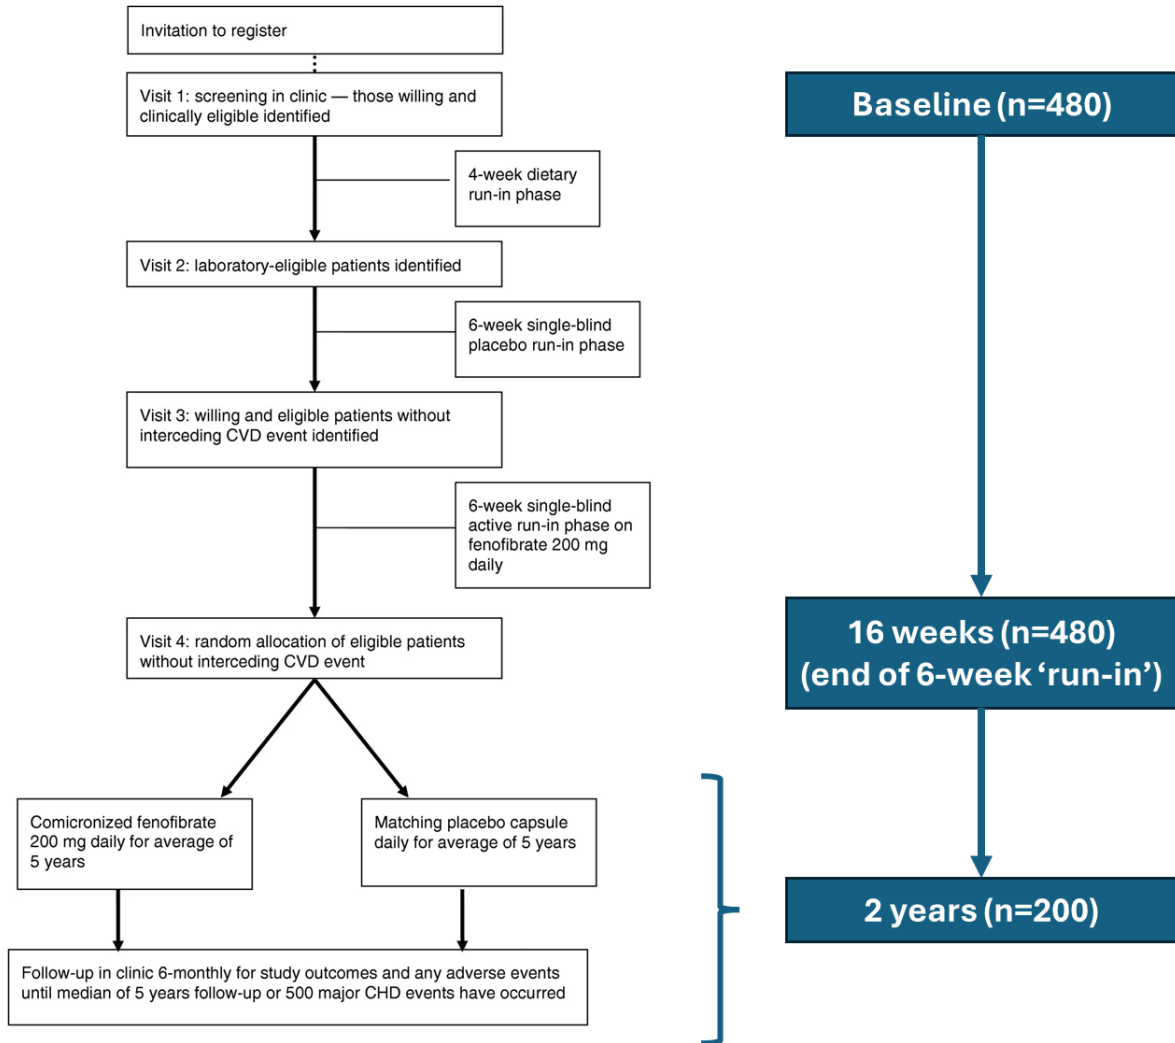

**Supplementary file**

J Diab Invest. Januszewski A.S. et al. **Haptoglobin Phenotype and Levels in Type 2 Diabetes and Effects of Fenofibrate.**

**Table 1**

Comparison of clinical chemistry results at baseline and at the end of trial run-in (post 6 weeks of fenofibrate treatment).

|                          | Baseline       | End of 6-week fenofibrate 'run-in' | p*                |
|--------------------------|----------------|------------------------------------|-------------------|
| HbA1c (%)**              | 6.8 ±1.3       | 7.2±1.4                            | <b>0.0002</b>     |
| HbA1c (mmol/mol)**       | 50.4±14.5      | 54.9±15.6                          | <b>0.0002</b>     |
| BMI (kg/m <sup>2</sup> ) | 30.8±5.6       | 30.7±5.6                           | 0.20              |
| TC (mmol/L)              | 5.0±0.7        | 4.4±0.7                            | <b>&lt;0.0001</b> |
| TG (mmol/L)              | 1.7 (1.3, 2.3) | 1.2 (0.9, 1.6)                     | <b>&lt;0.0001</b> |
| HDL-C (mmol/L)           | 1.1±0.3        | 1.2±0.3                            | <b>&lt;0.0001</b> |
| LDL-C (mmol/L)           | 3.0±0.7        | 2.6±0.6                            | <b>&lt;0.0001</b> |
| SBP (mmHg)               | 138±14         | 134±16                             | <b>&lt;0.0001</b> |
| DBP (mmHg)               | 81±8           | 80±10                              | <b>&lt;0.0001</b> |
| MAP (mmHg)               | 100±9          | 98±10                              | <b>&lt;0.0001</b> |
| eGFR (CKD-EPI)           | 95 (83, 102)   | 85 (72, 96)                        | <b>&lt;0.0001</b> |

\* – p-value: paired t-test or Wilcoxon test.

\*\* – HbA1c: baseline and 2 years values (16 weeks results not available), n=100 (subject randomised to receive fenofibrate treatment).
